# Supplementary material
Source: ML conference proceedings conference paper supplement (https://openaccess.thecvf.com/content/CVPR2026/html/Patel_VibeToken_Scaling_1D_CVPR_2026_paper.html)
Supplement: Supplementary file 1 [file Patel_VibeToken_Scaling_1D_CVPR_2026_supplemental.pdf]

# VibeToken: Scaling 1D Image Tokenizers and Autoregressive Models for Dynamic Resolution Generations

## Supplementary Material

### G. Extended Related Works

**Image tokenizers.** Tokenizers are central to modern image generation. Diffusion/flow models are typically built on continuous latents (*i.e.*, VAEs) and achieve state-of-the-art results, whereas AR models commonly rely on discrete latents (*e.g.*, VQ-VAE variants). Early AR systems use 2D tokenizers such as MAGViT [17], Open-MAGViT2 [24], and LlamaGen [37]. A known limitation is that the token count grows with resolution—*e.g.*, with stride 16, a  $1024 \times 1024$  image yields 4096 tokens—making scaling costly. DA-AR reduces tokens via stronger downsampling (*e.g.*,  $32 \times$  compression  $\Rightarrow$  1024 tokens at  $1024^2$ ), and CAT introduces LLM-guided *dynamic* compression for 2D VAEs; however, these encodings remain only partially flexible and still couple token length to spatial resolution. Recent work proposes 1D tokenizers with higher compression. TiTok [52] introduced the paradigm; TA-TiTok [16] extends training (with/without text conditioning). Subsequent approaches refine objectives, quantization, and training curricula [4, 5, 32]. Despite strong compression, many early 1D designs assume fixed training grids and output a *fixed* latent length, limiting generalization to unseen resolutions/aspect ratios. One-D-Piece and FlexTok [1, 26] enable *dynamic* latent lengths (*e.g.*, 1–256 tokens) but primarily at fixed resolutions, so cross-resolution generalization remains challenging. Instella-T2I [44] and Layton [48] scale 1D tokenizers to  $1024^2$  using as few as 128–256 tokens, yet the encodings are still tied to specific canvases and do not natively handle arbitrary aspect ratios. A-Token [22] moves toward arbitrary resolutions, but requires careful high-resolution training and remains sensitive to data/compute budgets. In contrast, **VibeToken** scales 1D tokenization to *resolution-agnostic* encodings: it decouples latent length from spatial size, supports dynamic token budgets, and generalizes across resolutions and aspect ratios without retraining per resolution. This flexibility enables the AR generator to operate with a fixed, user-controllable compute budget while retaining strong fidelity.

**Dynamic Resolution-adaptation for Transformers.** Vision Transformers (ViT) [8] are typically trained on fixed patch grids, making *length generalization* difficult due to absolute positional encodings and quadratic attention costs. A line of work improves flexibility primarily for *discriminative* tasks: ResFormer [40], DeiT [41], ViTAR [12], and NaViT [6] explore position encodings, packed batching, and attention variants to better handle variable input sizes, with ViTAR/NaViT showing notably stronger scaling than their

baselines. FlexiViT [2] enables *compute-adaptive* inference via dynamic patch sizes. Beyond absolute PEs, recent methods leverage Axial-RoPE and learned RoPE variants to improve cross-resolution extrapolation [13]. On the *generative* side, Diffusion Transformers (DiTs) [29] have been scaled to native resolutions with FiT-v1/v2 [23, 42] and NiT [43] through RoPE-based encodings and training strategies inspired by NaViT. However, autoregressive (AR) image generation remains largely fixed-resolution: token counts grow with resolutions and next-token training is brittle to length shifts. We bridge this gap by pairing a *resolution-agnostic* 1D tokenizer, **VibeToken**, with a LlamaGen-style AR head, **VibeToken-Gen**. The tokenizer decouples token *length* from spatial resolution, while the generator conditions on the target canvas; together, they enable arbitrary resolutions and aspect ratios under a constant, user-controllable token budget.

### H. Experimental Setup

This section details the training and inference setups for **VibeToken** (tokenizer) and **VibeToken-Gen** (AR generator).

#### H.1. VibeToken

Table F summarizes the hyperparameters for **VibeToken** and its ablations. We follow TiTok/TA-TiTok conventions, adopting TA-TiTok’s single-stage training (no text conditioning).

**Ablations.** We train a small encoder/decoder VAE for 200,000 iterations on  $4 \times H100$  with per-GPU batch size 32. The latter half of training uses an adversarial loss as well. Ablation models are trained at two resolutions,  $256 \times 256$  and  $512 \times 512$ .

**Final tokenizer.** The scaled **VibeToken** uses multi-vector quantization (MVQ) with 8 codebooks and 256 latent dimensions per token, factorized into 8 sub-codes of 32 dimensions each. The maximum latent length is variable in [32, 256]; each token comprises 8 sub-tokens *without* increasing the AR sequence length. Concretely, following the RQ-Transformer style prediction-head, the AR embedding/output layers combine the 8 sub-codes within the channel dimension after UniTok, so time length  $L$  is unchanged.

| Config                | Ablations                          | VibeToken                                                                                          |
|-----------------------|------------------------------------|----------------------------------------------------------------------------------------------------|
| Model Type            | VAE                                | MVQ                                                                                                |
| Token size            | 16                                 | 256                                                                                                |
| # of codebooks        | —                                  | 8                                                                                                  |
| Vocab size            | —                                  | 32768                                                                                              |
| Encoder/Decoder       | SS                                 | SL/LL                                                                                              |
| Discriminator start   | 100,000                            | 300,000                                                                                            |
| Quantizer weight      | 1                                  | 1                                                                                                  |
| Discriminator weight  | 0.1                                | 1                                                                                                  |
| Perceptual weight     | 1.1                                | 1.1                                                                                                |
| Reconstruction weight | 1                                  | 1                                                                                                  |
| Commitment cost       | —                                  | 0.25                                                                                               |
| KL weight             | $1 \times 10^{-6}$                 | —                                                                                                  |
| # of tokens           | 256                                | 32–256                                                                                             |
| Optimizer             |                                    | AdamW                                                                                              |
| Learning rate         |                                    | 0.0001                                                                                             |
| GAN LR                |                                    | 0.0001                                                                                             |
| $\beta_1$             |                                    | 0.9                                                                                                |
| $\beta_2$             |                                    | 0.999                                                                                              |
| Weight decay          |                                    | 0.0001                                                                                             |
| Scheduler             |                                    | Cosine                                                                                             |
| Warmup steps          |                                    | 10,000                                                                                             |
| Dataset               | ImageNet1k                         | ImageNet1k                                                                                         |
| Batch size / GPU      | 32                                 | 8                                                                                                  |
| Gradient accumulation | 1                                  | 2                                                                                                  |
| GPUs                  | 4×H100s                            | 8×H100s                                                                                            |
| Precision             | bf16                               | bf16                                                                                               |
| Training steps        | 200,000                            | 600,000                                                                                            |
| Variable resolutions  | { "256x256": 0.5, "512x512": 0.5 } | { "256x256": 0.3, "512x512": 0.3, "384x256": 0.1, "256x384": 0.1, "512x384": 0.1, "384x512": 0.1 } |

Table F. **VibeToken** pretraining setup.

**Training schedule.** We train the **SL** and **LL** variants for 600,000 iterations on a single node with 8×H100 GPUs, batch size 8 per GPU, and gradient accumulation 2 (effective batch 128). Training images are sampled over six resolutions/aspect ratios between 256×256 and 512×512 with probabilities listed in Table F. Despite training below 512<sup>2</sup>, **VibeToken** generalizes to higher resolutions (1024<sup>2</sup>) without sacrificing reconstruction performance.

## H.2. VibeToken-Gen

Table G lists pretraining settings for **VibeToken-Gen B** ( $\approx$  90M) and **XXL** ( $\approx$  1.4B). Aside from model size, the setups are identical where possible (epochs and GPU count scale with size).

**Tokenizer and tokens.** We fix the tokenizer to **VibeToken-MVQ-LL**. Tokens of length  $L \in \{64, 128, 256\}$  are extracted over eight resolutions according to Table G. For simplicity, the encoder patch size is 16×16.

**Model and training.** Following LlamaGen, we train on ImageNet-1k with ten-crop augmentation. We apply QK LayerNorm for stability. To predict MVQ sub-codes efficiently, we attach a lightweight 4-layer residual transformer

| Config                      | GPT-B                                                                                                                                    | GPT-XXL |
|-----------------------------|------------------------------------------------------------------------------------------------------------------------------------------|---------|
| <b>Tokenizer &amp; Data</b> |                                                                                                                                          |         |
| Tokenizer                   | VibeToken-MVQ-LL                                                                                                                         |         |
| Tokens                      | 64 / 128 / 256                                                                                                                           |         |
| Resolutions                 | { "256x256": 0.3, "512x512": 0.3, "384x256": 0.07, "256x384": 0.07, "512x384": 0.07, "384x512": 0.07, "256x512": 0.06, "512x256": 0.06 } |         |
| Encoder patch size          | 16x16 (fixed for simplicity)                                                                                                             |         |
| Dataset                     | ImageNet1k                                                                                                                               |         |
| <b>Model Architecture</b>   |                                                                                                                                          |         |
| Prediction head layers      | 4                                                                                                                                        |         |
| # of codebooks              | 8                                                                                                                                        |         |
| Vocab size                  | 32768                                                                                                                                    |         |
| Sequence length             | 64 / 128 / 256                                                                                                                           |         |
| Class-dropout prob.         | 0.1                                                                                                                                      |         |
| Additional norm layers      | QK                                                                                                                                       |         |
| Dropout prob.               | 0.1                                                                                                                                      |         |
| <b>Training Setup</b>       |                                                                                                                                          |         |
| Epochs                      | 300                                                                                                                                      | 150     |
| Optimizer                   | AdamW                                                                                                                                    |         |
| Learning rate               | 0.0001                                                                                                                                   |         |
| $\beta_1$                   | 0.9                                                                                                                                      |         |
| $\beta_2$                   | 0.95                                                                                                                                     |         |
| Weight decay                | 0.05                                                                                                                                     |         |
| Precision                   | None                                                                                                                                     |         |
| Schedule                    | Linear                                                                                                                                   |         |
| GPUs                        | 4×H100–8×H100                                                                                                                            | 8×H100  |

Table G. Hyperparameters for *GPT-B* and *GPT-XXL* configurations of **VibeToken-Gen**.

head after UniTok that predicts the 8 sub-codes per token; this reduces FLOPs by keeping the temporal length  $L$  fixed while factorizing predictions across sub-codes. We observed instability with `bf16`; all AR training is therefore conducted in `fp32`.

**Inference and evaluation.** Unless stated otherwise, quantitative results use classifier-free guidance (CFG) fixed across runs with sampling parameters: temperature= 1.0, top- $k$ =0, top- $p$ =1.0. Qualitative samples use CFG= 4.0, temperature= 0.9, top- $k$ =500, top- $p$ =1.0. The decoder patch size is fixed to 16×16 for resolutions  $\leq$  512×512 and 32×32 for higher resolutions.

## I. Ablations

### I.1. VibeToken

**Image Super-Resolution.** Table H evaluates the *native* super-resolution capability of **VibeToken** against diffusion/flow upsamplers (e.g., SDXL/Flux upsamplers). Existing tokenizers generally *lack* native SR and require a separately trained upsampler; **VibeToken** does not. We use 10k FFHQ images at 1024×1024, bicubically downsample to 256×256 and 512×512 for 4× and 2× SR, respectively, and report PSNR/SSIM/LPIPS. Diffusion upsamplers tend to achieve higher PSNR (favoring smoothness), while **VibeToken** yields stronger SSIM and lower LPIPS, indicating better structure and perceptual fidelity. Thus, **VibeToken**

| Model               | Type      | NFEs | Scale      | PSNR $\uparrow$ | SSIM $\uparrow$ | LPIPS $\downarrow$ |
|---------------------|-----------|------|------------|-----------------|-----------------|--------------------|
| SDXL-Upscaler       | Diffusion | 20   |            | <b>27.97</b>    | 0.710           | 0.317              |
| Flux-Upscaler       | Diffusion | 20   | 2 $\times$ | 25.17           | 0.609           | 0.377              |
| <b>VibeToken-LL</b> | VQ-VAE    | 1    |            | 24.98           | <b>0.838</b>    | <b>0.261</b>       |
| SDXL-Upscaler       | Diffusion | 20   |            | <b>29.10</b>    | 0.721           | 0.361              |
| Flux-Upscaler       | Diffusion | 20   | 4 $\times$ | 25.88           | 0.637           | 0.357              |
| <b>VibeToken-LL</b> | VQ-VAE    | 1    |            | 24.11           | <b>0.805</b>    | <b>0.310</b>       |
| <b>VibeToken-LL</b> | VQ-VAE    | 1    | 1 $\times$ | 24.91           | 0.839           | 0.263              |

Table H. **Super-resolution ablation.** Ground truth high resolution is fixed to 1024 $\times$ 1024 and bicubic downsampling is used to get low resolution counterparts.

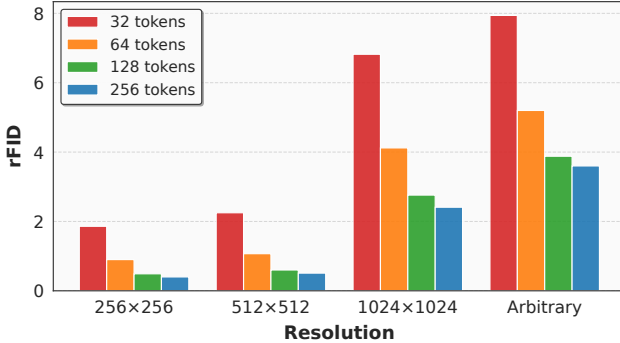

Figure E. **Token-length Analysis.** rFID performance of **VibeToken-LL** with different token lengths across the resolutions. Notably, reference images are different for each resolutions, hence, rFID scale and performance is not comparable between each resolutions.

delivers competitive SR *without* high-resolution pretraining or an extra upsampler. Qualitative examples are shown in Figure N.

**Token Length vs. Resolutions.** Figure E shows that **VibeToken** maintains strong reconstruction quality across resolutions while supporting dynamic-length encoding. In practice, **128 tokens** offer an excellent quality–compute balance for reconstruction; **256 tokens** provide small additional gains at higher cost. Notably, for *generation*, **64 tokens** are most effective—later tokens primarily capture high-frequency details that benefit reconstruction more than synthesis. This separation suggests using short sequences for AR generation and longer sequences when reconstruction fidelity is paramount.

**Generalization beyond ImageNet.** Table J compares the **VibeToken-LL** performance on MSCOCO for two resolutions along with IBQ and other 1D tokenizers. It can be observed that despite **VibeToken** only trained on ImageNet (single entity focused) it generalizes to more complex images and achieves SoTA performance on 256 $\times$ 256 resolution and gets competitive performance to 2D tokenizer.

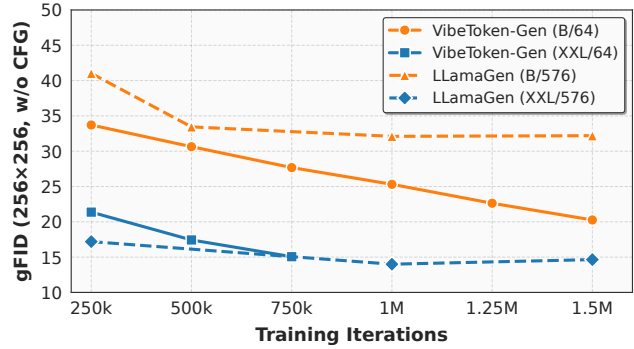

Figure F. **Convergence Analysis.** gFID performance of **VibeToken-Gen** and baseline LlamaGen models as training progresses. The results are shown on 256 $\times$ 256 without classifier-free guidance.

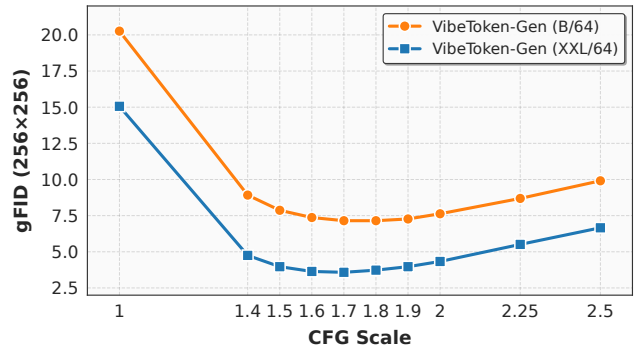

Figure G. **CFG Analysis.** gFID performance of **VibeToken-Gen-B/XXL** with respect to classifier-free guidance scale on 256 $\times$ 256.

**Extended Reconstruction Results.** Table I provides the detailed results on ImageNet across reconstruction metrics such as PSNR, SSIM, LPIPS and rFID. **VibeToken** consistently outperforms the 1D tokenizers and performs competitively to 2D tokenizers. Importantly, 2D tokenizers have 1024 tokens for 512 $\times$ 512 resolutions while **VibeToken** only requires 256 tokens and can support as low as 64 tokens.

## I.2. VibeToken-Gen

**Convergence.** Figure F compares training dynamics of **VibeToken-Gen** and LlamaGen at Base and XXL variants, evaluated on 256<sup>2</sup> *without* CFG to expose true likelihood learning. **VibeToken-Gen** continues improving with training and surpasses LlamaGen, whereas LlamaGen saturates early and shows limited gains thereafter. This indicates better scaling of **VibeToken-Gen**, attributable to shorter sequences and resolution-agnostic 1D tokens. Due to compute limits, we train **VibeToken-Gen-XXL/64** to 750k iterations ( $\approx$  150 epochs); based on the B/64 trend, we expect further improvements with longer training.

| Model               | Type | ImageNet 256×256 |               |               |             | ImageNet 512×512 |               |               |             |
|---------------------|------|------------------|---------------|---------------|-------------|------------------|---------------|---------------|-------------|
|                     |      | PSNR↑            | SSIM↑         | LPIPS↓        | rFID↓       | PSNR↑            | SSIM↑         | LPIPS↓        | rFID↓       |
| MAGVIT-v2           | 2D   | 22.62            | 0.5870        | 0.2050        | 1.17        | <u>24.67</u>     | 0.6510        | 0.2090        | <u>0.50</u> |
| IBQ                 | 2D   | 22.95            | 0.5960        | 0.1980        | 0.97        | <b>25.19</b>     | 0.6620        | 0.2010        | <b>0.40</b> |
| LLaMAGen            | 2D   | 21.44            | 0.5320        | 0.2240        | 2.10        | 23.76            | 0.6140        | 0.2180        | 0.65        |
| TiTok-B             | 1D   | -                | -             | -             | 1.70        | -                | -             | -             | 1.52        |
| VAR                 | 1D   | -                | -             | -             | 0.90        | -                | -             | -             | -           |
| ImageFolder         | 1D   | -                | -             | -             | 0.80        | -                | -             | -             | -           |
| UniTok              | 1D   | -                | -             | -             | 0.33        | -                | -             | -             | -           |
| One-D-Piece-L       | 1D   | 19.04            | -             | -             | 1.08        | -                | -             | -             | -           |
| DetailFlow          | 1D   | -                | -             | -             | 0.55        | -                | -             | -             | -           |
| Instella            | 1D   | -                | -             | -             | -           | 22.25            | 0.7040        | -             | 1.32        |
| <b>VibeToken-SL</b> | 1D   | <u>24.47</u>     | <u>0.8069</u> | <u>0.1137</u> | <u>0.43</u> | 22.86            | <u>0.7541</u> | 0.1998        | 0.55        |
| <b>VibeToken-LL</b> | 1D   | <b>25.04</b>     | <b>0.8194</b> | <b>0.1048</b> | <b>0.40</b> | 23.37            | <b>0.7649</b> | <b>0.1867</b> | 0.51        |

Table I. ImageNet reconstruction results across the diverse metrics at 256×256 and 512×512. Best is shown in bold and second best is underlined. **VibeToken** consistently outperforms 1D tokenizers and performs competitively to 2D tokenizer while having higher compression rates.

| Model                          | 256×256     |              |              | 512×512     |              |              |
|--------------------------------|-------------|--------------|--------------|-------------|--------------|--------------|
|                                | FID↓        | PSNR↑        | SSIM↑        | FID↓        | PSNR↑        | SSIM↑        |
| IBQ (2D)                       | 6.14        | 22.56        | 0.603        | <b>4.12</b> | <b>24.50</b> | 0.656        |
| TiTok-SL/256                   | 6.84        | 21.60        | 0.726        | -           | -            | -            |
| One-D-Piece-LL/256             | 8.02        | 18.41        | 0.612        | -           | -            | -            |
| <b>VibeToken-LL/256 (ours)</b> | <b>3.59</b> | <b>24.71</b> | <b>0.828</b> | <u>4.46</u> | <u>22.68</u> | <b>0.757</b> |

Table J. Comparison of **VibeToken-LL** on MSCOCO validation set across 256 × 256 and 512 × 512 resolutions. Best results are in bold, and second-best are underlined.

| Model vs. Sec/Img                              | 256×256      | 1024×1024    |
|------------------------------------------------|--------------|--------------|
| <i>Tokenizer enc./dec. only</i>                |              |              |
| LlamaGen-Tok                                   | <b>0.005</b> | 0.082        |
| <b>VibeToken-LL</b>                            | 0.017        | <b>0.017</b> |
| <i>End-to-end incl. tok. dec. + generation</i> |              |              |
| LlamaGen / XXL                                 | <b>0.20</b>  | 32.79        |
| <b>VibeToken-Gen / XXL</b>                     | 0.46         | <b>0.46</b>  |

Table K. Inference speed (seconds per image) comparison across resolutions.

**Impact of classifier-free guidance.** Figure G shows smooth behavior across CFG scales. After convergence, both B and XXL models achieve their best gFID around 1.7–1.8. Accordingly, we use CFG= 1.75 and CFG= 2.0 when reporting **VibeToken-Gen** results.

**Efficiency Analysis.** Table K shows the comparison of **VibeToken** and **VibeToken-Gen** for reconstruction and generation tasks with respect to LlamaGen. It can be observed that LlamaGen (theoretically) requires 32 seconds to generate 1024×1024 resolution images while **VibeToken-Gen** can do sub-one second generations.

## J. Qualitative Results

Figures H, I, J, K, L, and M illustrate samples from six ImageNet1k classes generated by **VibeToken-Gen** (XXL/64) at random resolutions. **VibeToken-Gen** consistently produces high-resolution, variable-aspect-ratio images using only 64 tokens. Some crops or truncations may appear; we attribute these artifacts to the randomized cropping used during AR training.

## K. Limitations and Future Works

Our experiments focus on ImageNet-1k and class-conditional generation; extending to text-to-image, open-vocabulary settings, and video is an important next step. As a resolution *generalist* model, **VibeToken-Gen** can trail single-resolution specialists at exactly  $256^2/512^2$  under the same budget. Further scaling, longer training, and stronger data augmentation may reduce this gap. Methodologically, exploring other AR variants (*e.g.* randomized orderings, scale-wise training), alternative quantization schemes, and larger pretraining corpora could improve quality. Finally, applying resolution-agnostic tokenization to unified mul-

timodal modeling (*e.g.* image–text–video) is a promising direction for significantly efficient production-grade generative systems.

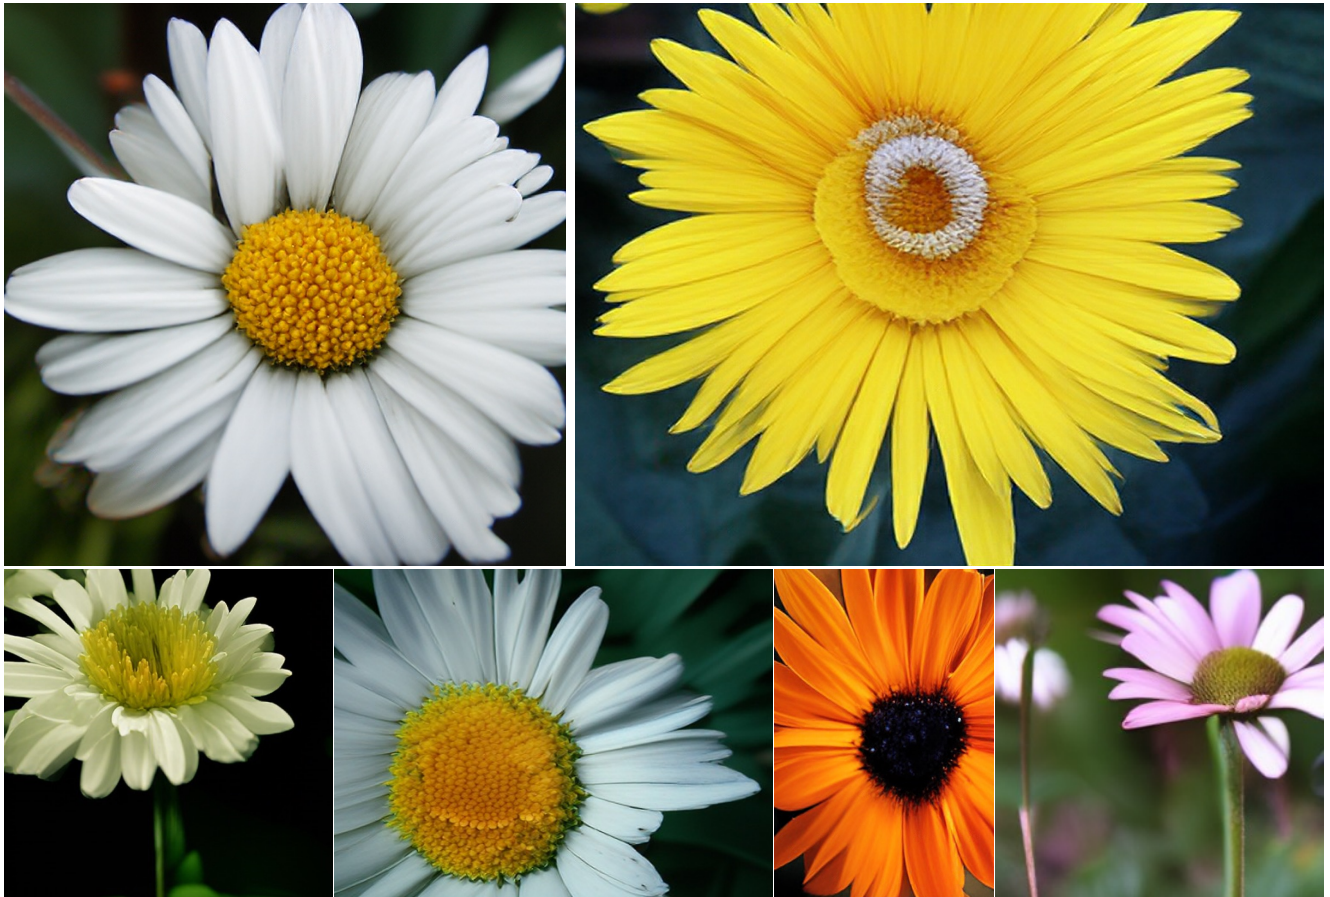

Figure H. **Class 985**. Qualitative examples of generated images using **VibeToken-Gen (XXL/64)** on arbitrary resolutions.

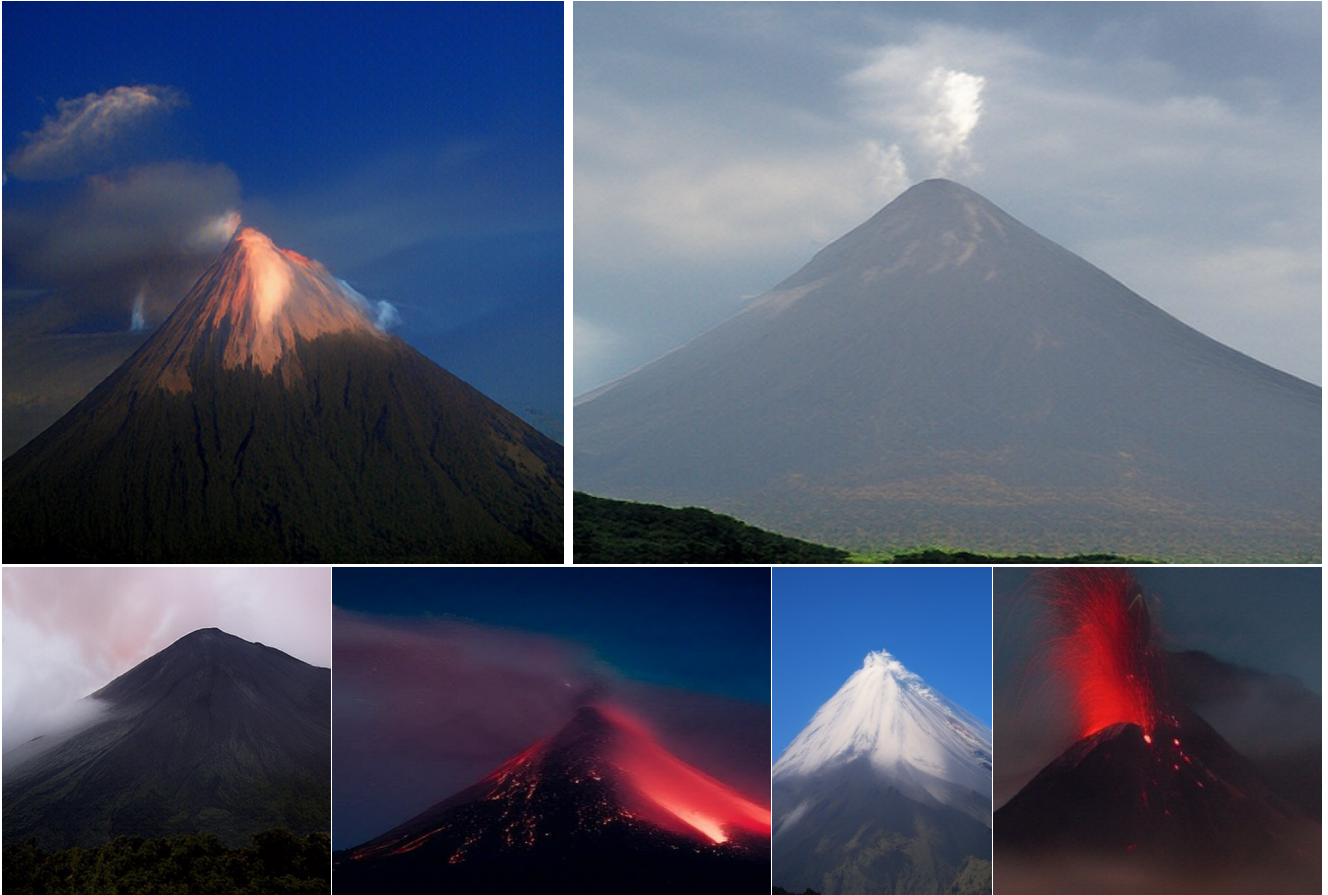

Figure I. **Class 980**. Qualitative examples of generated images using **VibeToken-Gen** (XXL/64) on arbitrary resolutions.

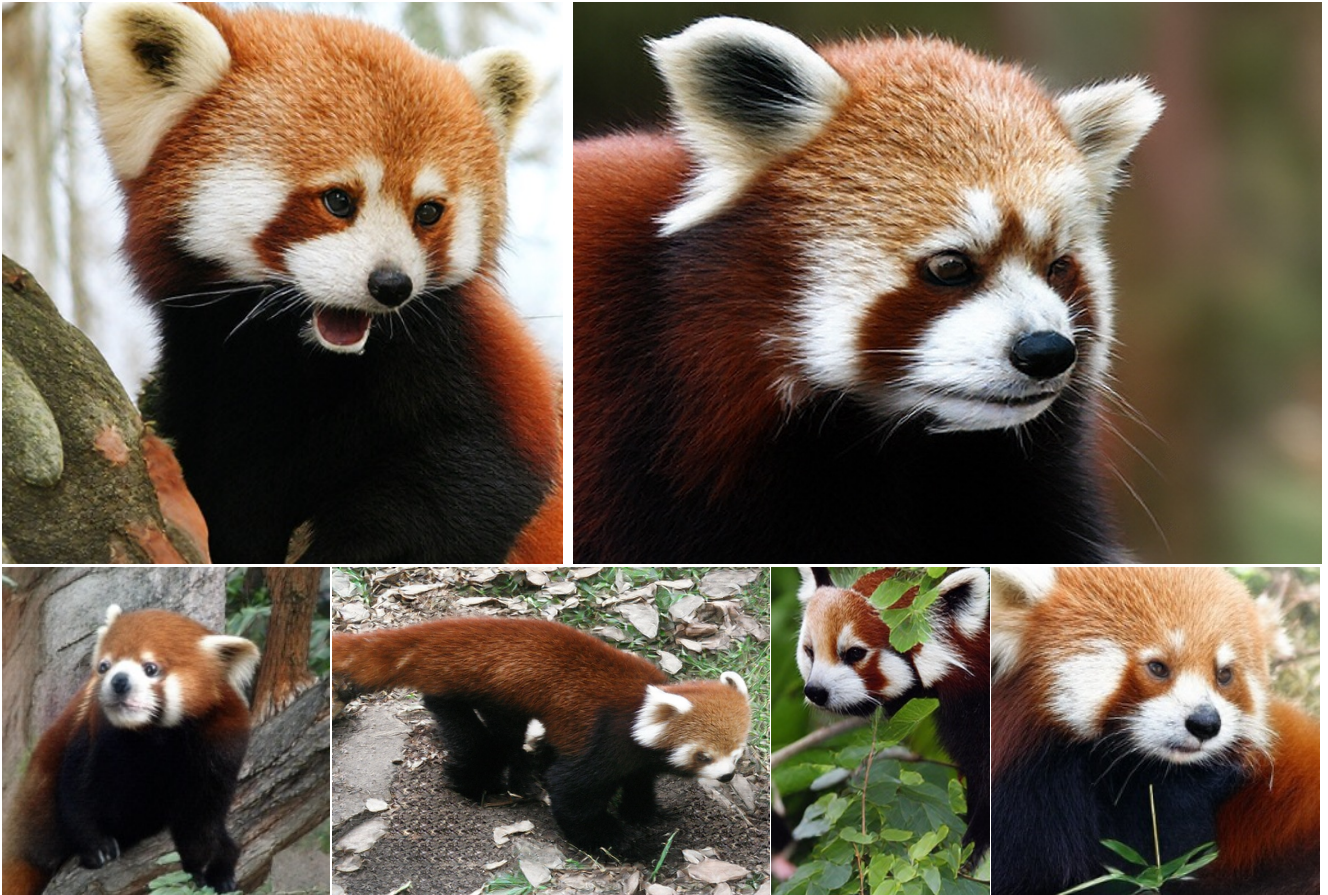

Figure J. Class 387. Qualitative examples of generated images using [VibeToken-Gen](#) (XXL/64) on arbitrary resolutions.

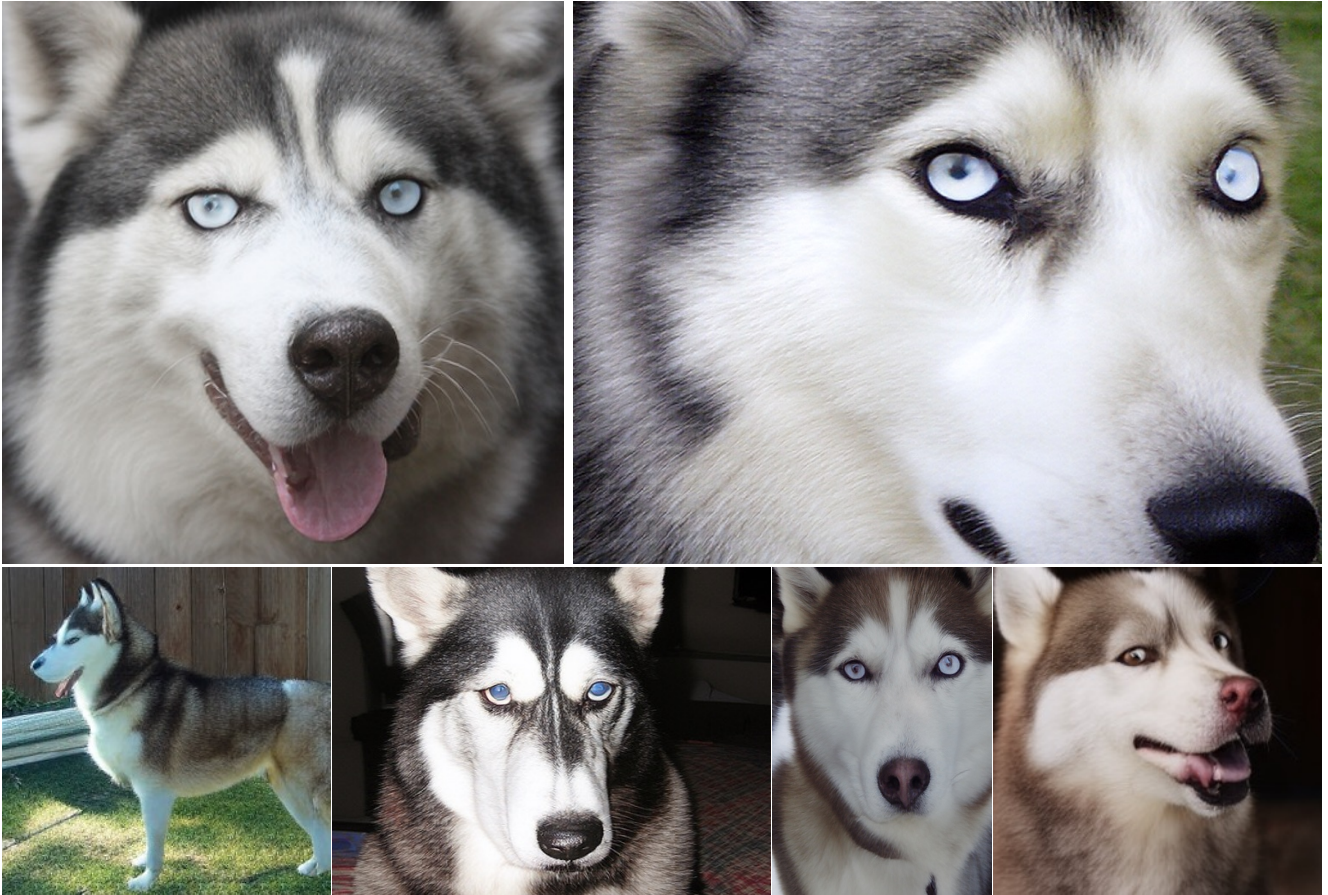

Figure K. **Class 250**. Qualitative examples of generated images using [VibeToken-Gen \(XXL/64\)](#) on arbitrary resolutions.

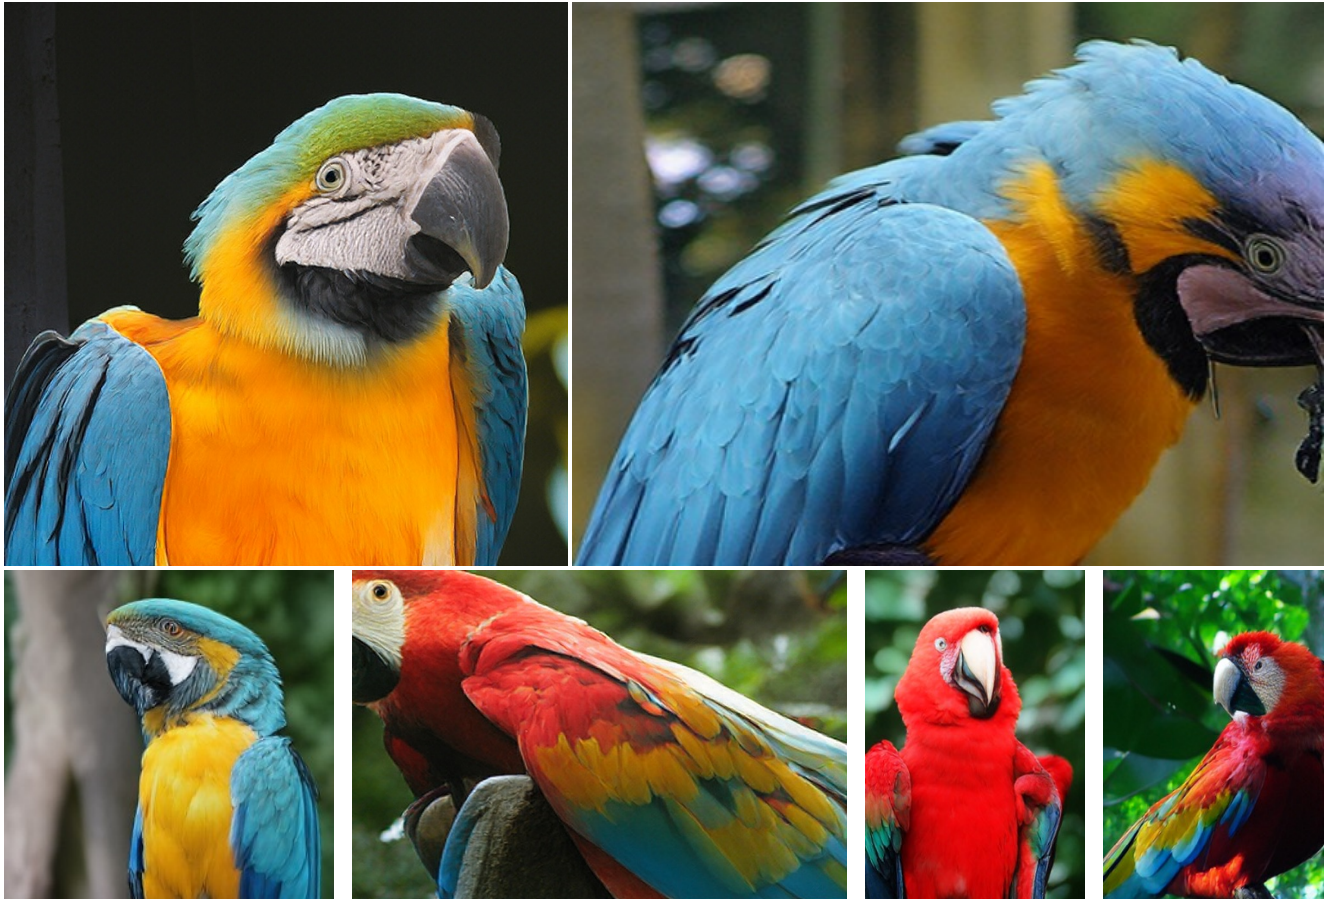

Figure L. **Class 88**. Qualitative examples of generated images using **VibeToken-Gen** (XXL/64) on arbitrary resolutions.

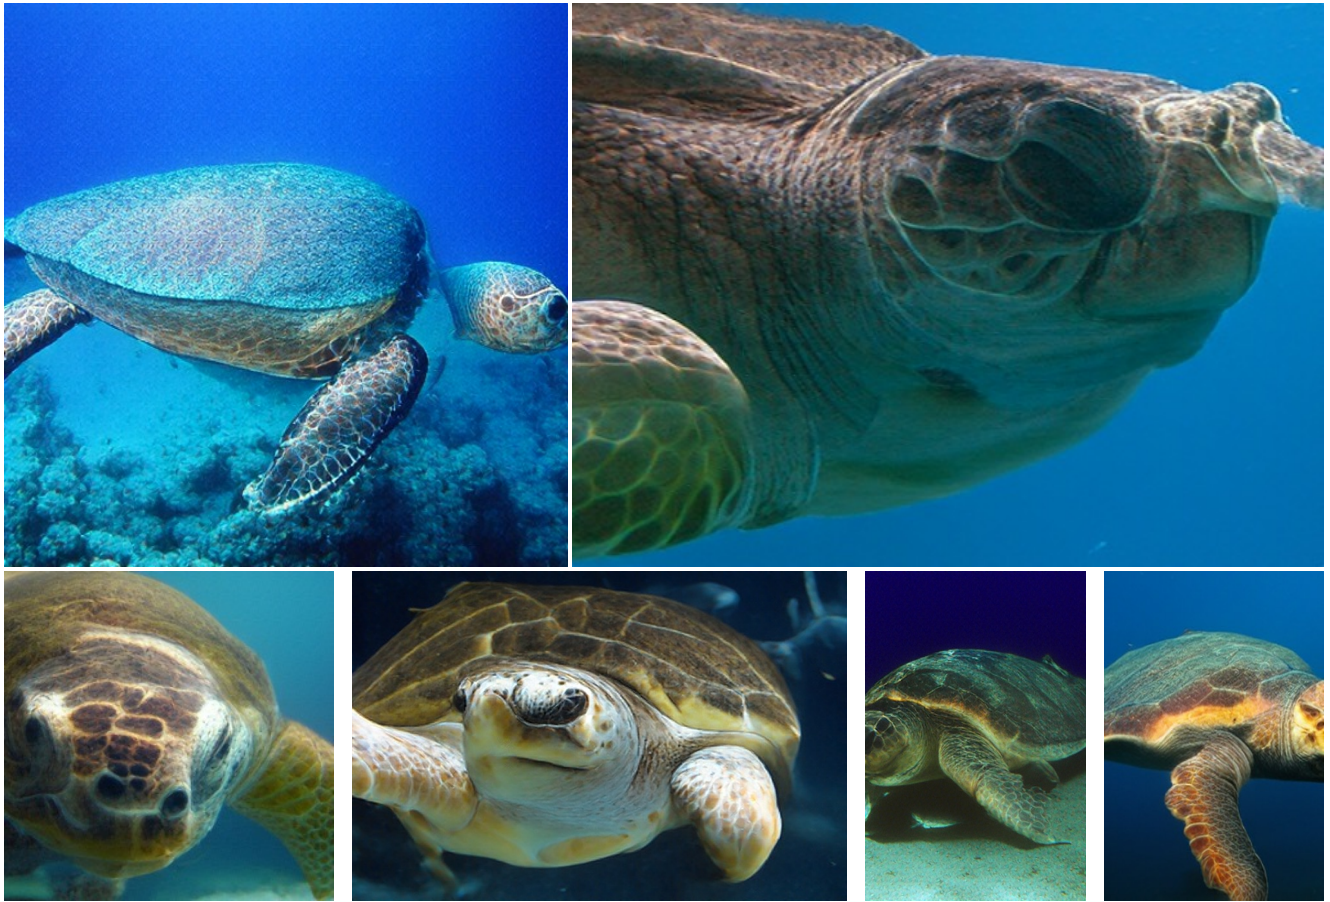

Figure M. **Class 33**. Qualitative examples of generated images using **VibeToken-Gen (XXL/64)** on arbitrary resolutions.

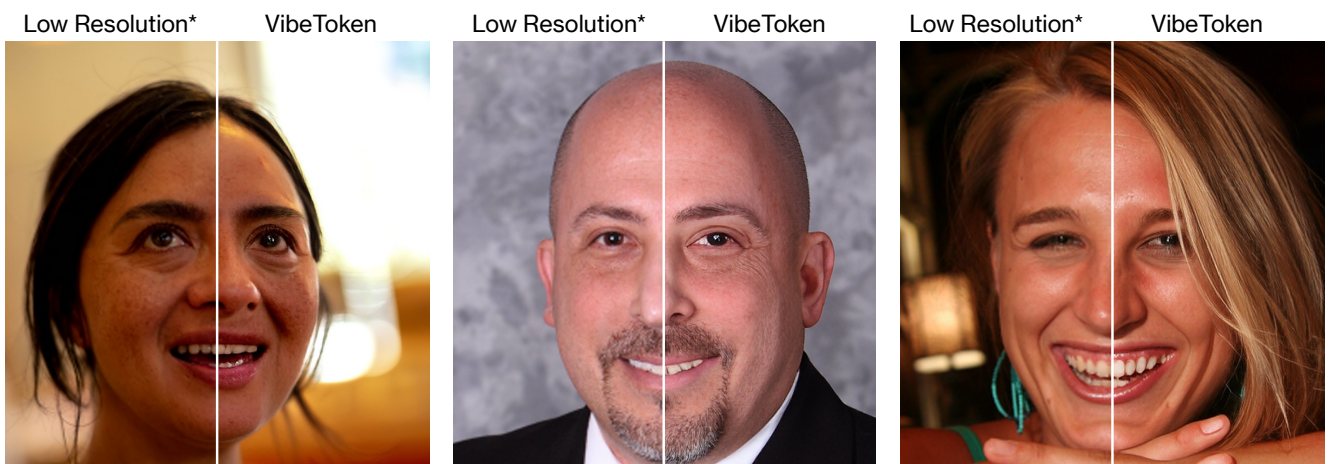

Figure N. **Super-resolution Task**. Qualitative examples of native 4× super-resolution ability of **VibeToken** with respect to simple bilinear resize operation.
